# Supplementary material for: From binding to breakdown: biophysical and molecular insights into fluoroquinolone induced F-actin perturbation
Source: Research Square preprint supplement (doi:10.21203/rs.3.rs-6693104/v1), 2025-06-09
Supplement: Supplementary file 1 [file 58713b3cd5ea5a01a2547e54.pdf]

## **From binding to breakdown: biophysical and molecular insights into fluoroquinolone induced F-actin perturbation**

Rahul Gupta<sup>1</sup>, Hridhya Nair<sup>1</sup>, Tanveera Rounaque Sarhadi<sup>2</sup>, Shirisha Nagotu<sup>2</sup>, Pramodkumar P. Gupta<sup>3</sup>, Sarath Chandra Dantu<sup>4,5 #</sup>, Avinash Kale<sup>1\*</sup>

<sup>1</sup>School of Chemical Sciences, UM-DAE Center for excellence in basic sciences, University of Mumbai, Mumbai, Maharashtra, India

<sup>2</sup>Department of Biosciences and Bioengineering, Indian Institute of Technology Guwahati, Guwahati, Assam, India

<sup>3</sup>School of Biotechnology and Bioinformatics, D Y Patil Deemed to be University, Plot 50 Sector 15, CBD Belapur, Navi Mumbai 400614, Maharashtra, India

<sup>4</sup>Department of Computer Science, Brunel University London, Uxbridge UB8 3PH, United Kingdom

<sup>5</sup>The Thomas Young Centre for Theory and Simulation of Materials, London SW7 2AZ, United Kingdom

\*Corresponding author [avinash.kale@cbs.ac.in](mailto:avinash.kale@cbs.ac.in)

#Co-corresponding author [Sarath.Dantu@brunel.ac.uk](mailto:Sarath.Dantu@brunel.ac.uk)

## Supplementary Figures

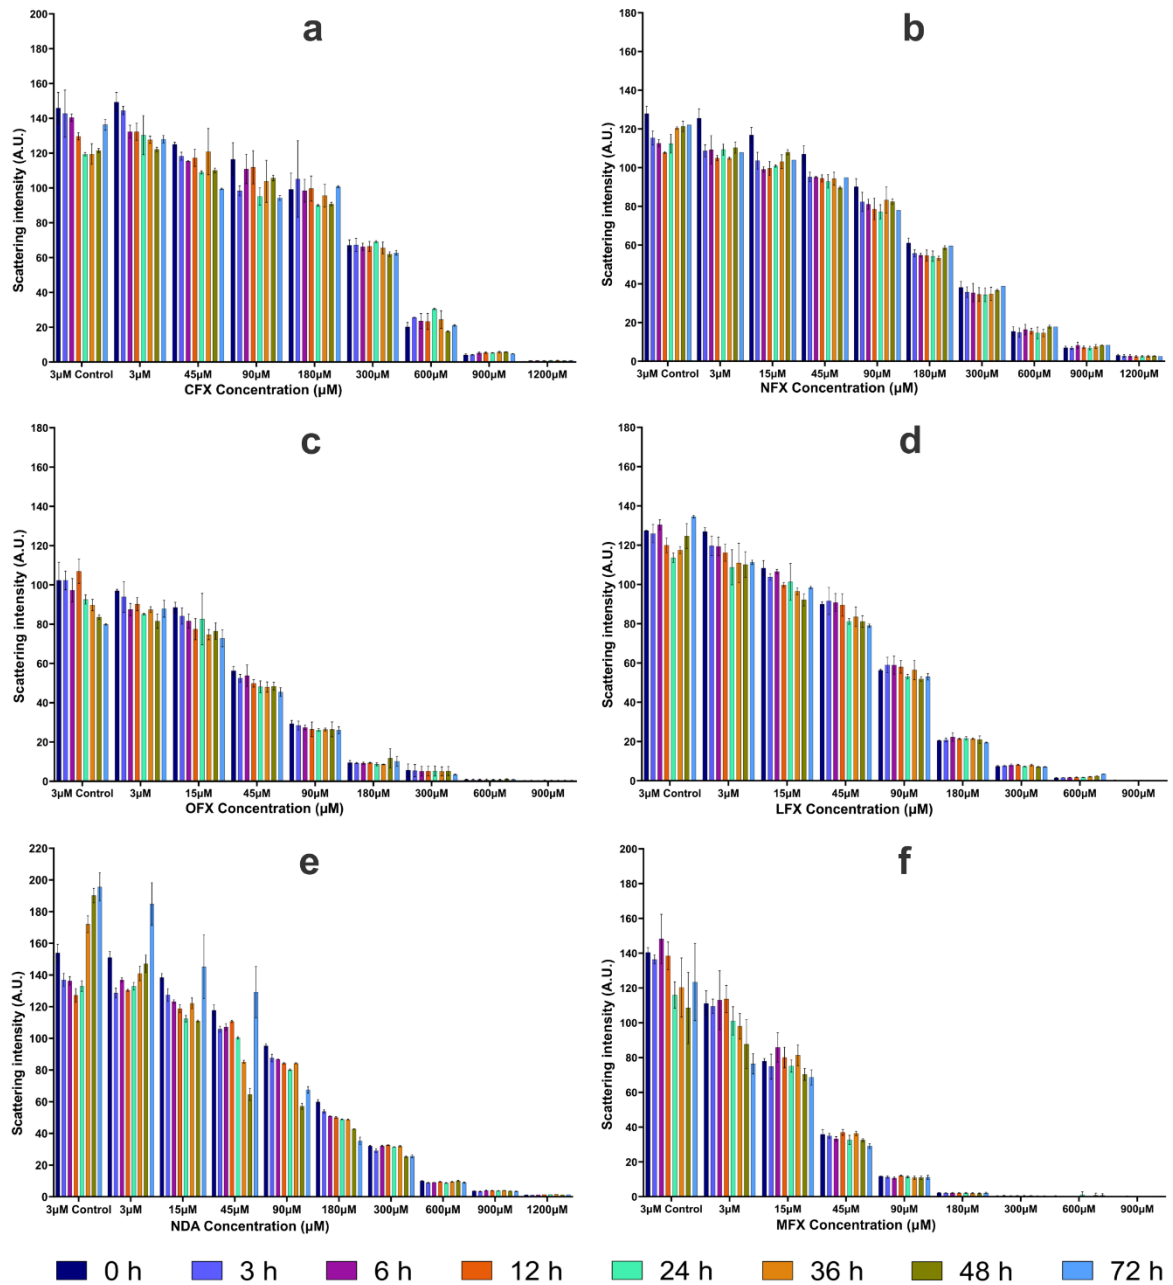

**Fig.S1.** F-actin disruption assay using Right Angle Light Scattering (RALS) measurements. F-actin treated with (a) CFX; (b) NFX; (c) OFX; (d) LFX; (e) NDA; (f) MFX at various concentrations (3-1200 μM) for 72 hours. The different colours bars represent measurement time points. Data represents mean and the standard error of mean (mean ± SEM), n=3.

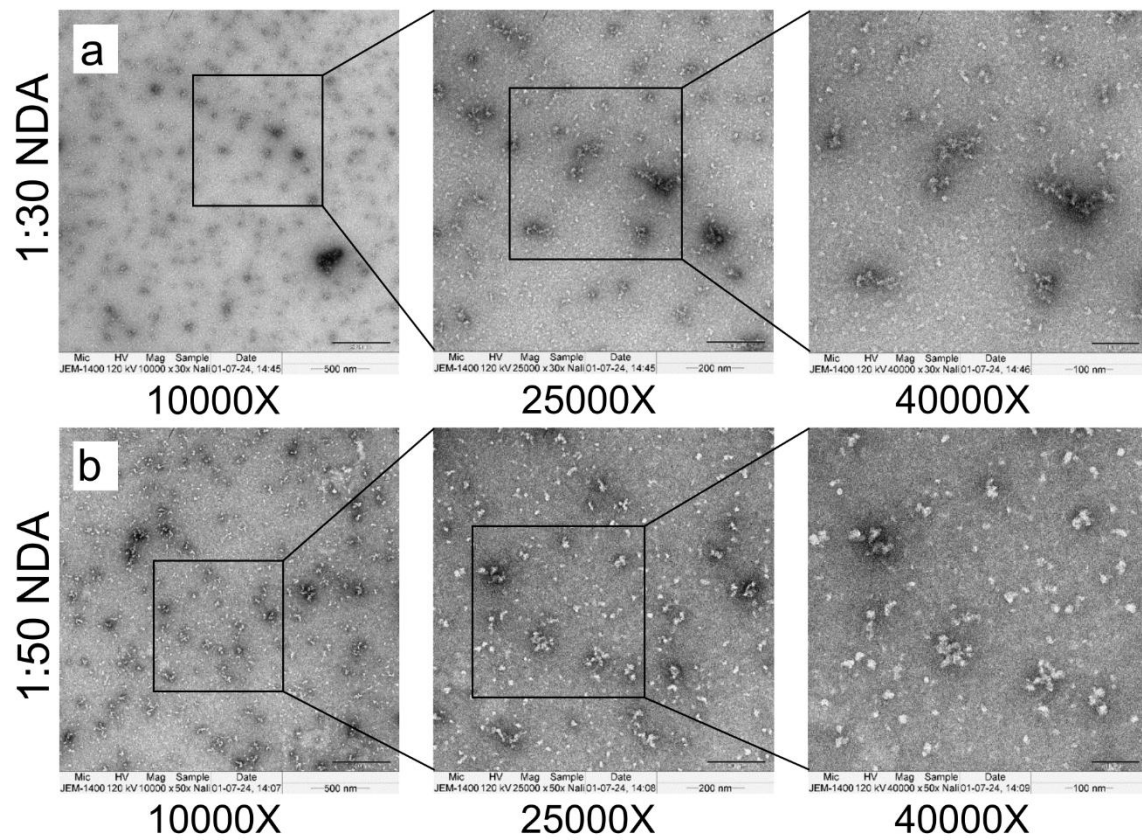

**Fig.S2.** NDA-induced morphological changes in F-actin visualized by TEM. (a) F-actin treated with NDA at a 1:30 molar ratio; (b) F-actin treated with NDA at a 1:50 molar ratio. Images were captured at 10,000 $\times$  (scale bar: 500 nm), 25,000 $\times$  (scale bar: 200 nm), and 40,000 $\times$  (scale bar: 100 nm).

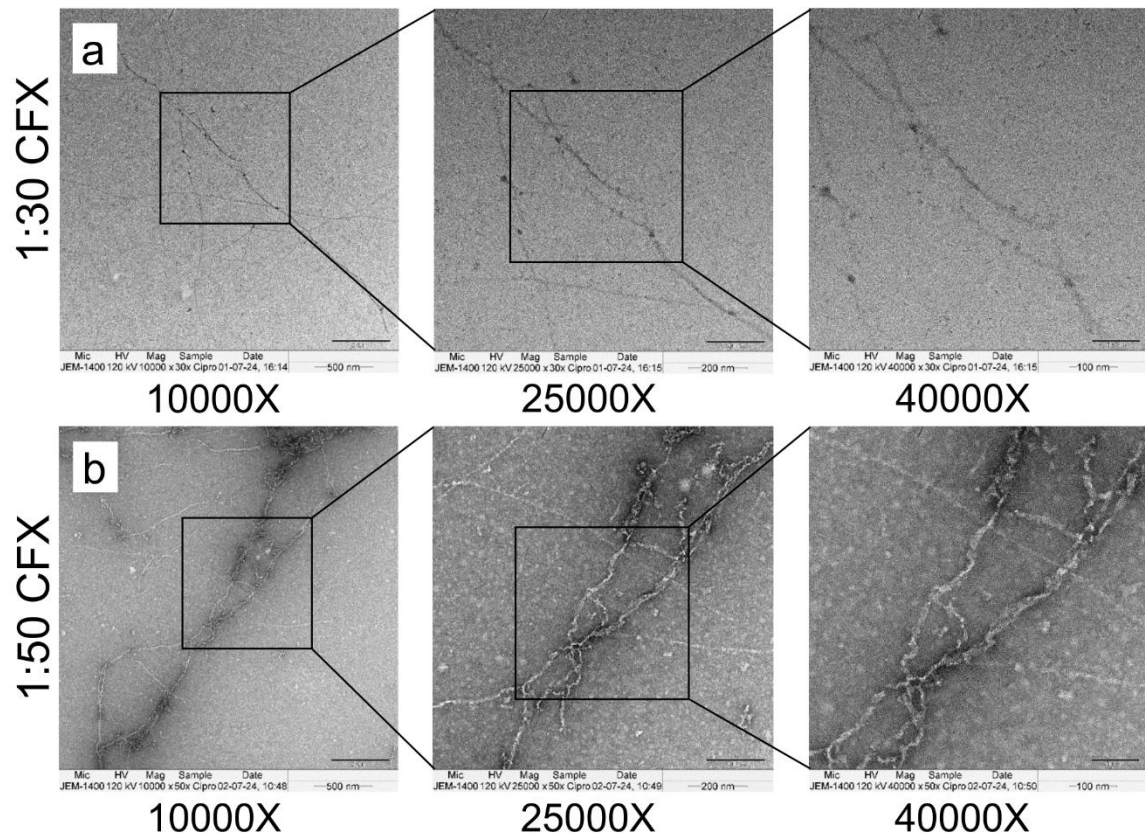

**Fig.S3.** CFX-induced morphological changes in F-actin visualized by TEM. (a) F-actin treated with CFX at a 1:30 molar ratio; (b) F-actin treated with CFX at a 1:50 molar ratio. Images were captured at 10,000 $\times$  (scale bar: 500 nm), 25,000 $\times$  (scale bar: 200 nm), and 40,000 $\times$  (scale bar: 100 nm).

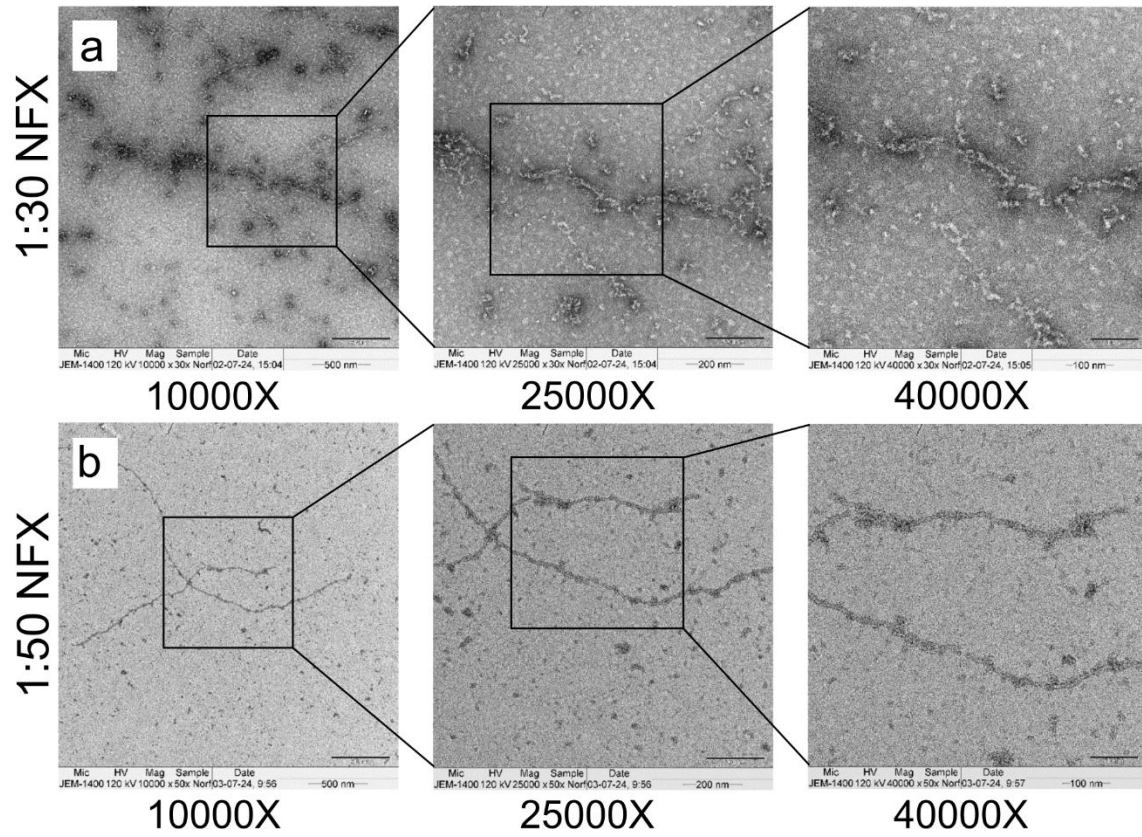

**Fig.S4.** NFX-induced morphological changes in F-actin visualized by TEM. (a) F-actin treated with NFX at a 1:30 molar ratio; (b) F-actin treated with NFX at a 1:50 molar ratio. Images were captured at 10,000 $\times$  (scale bar: 500 nm), 25,000 $\times$  (scale bar: 200 nm), and 40,000 $\times$  (scale bar: 100 nm).

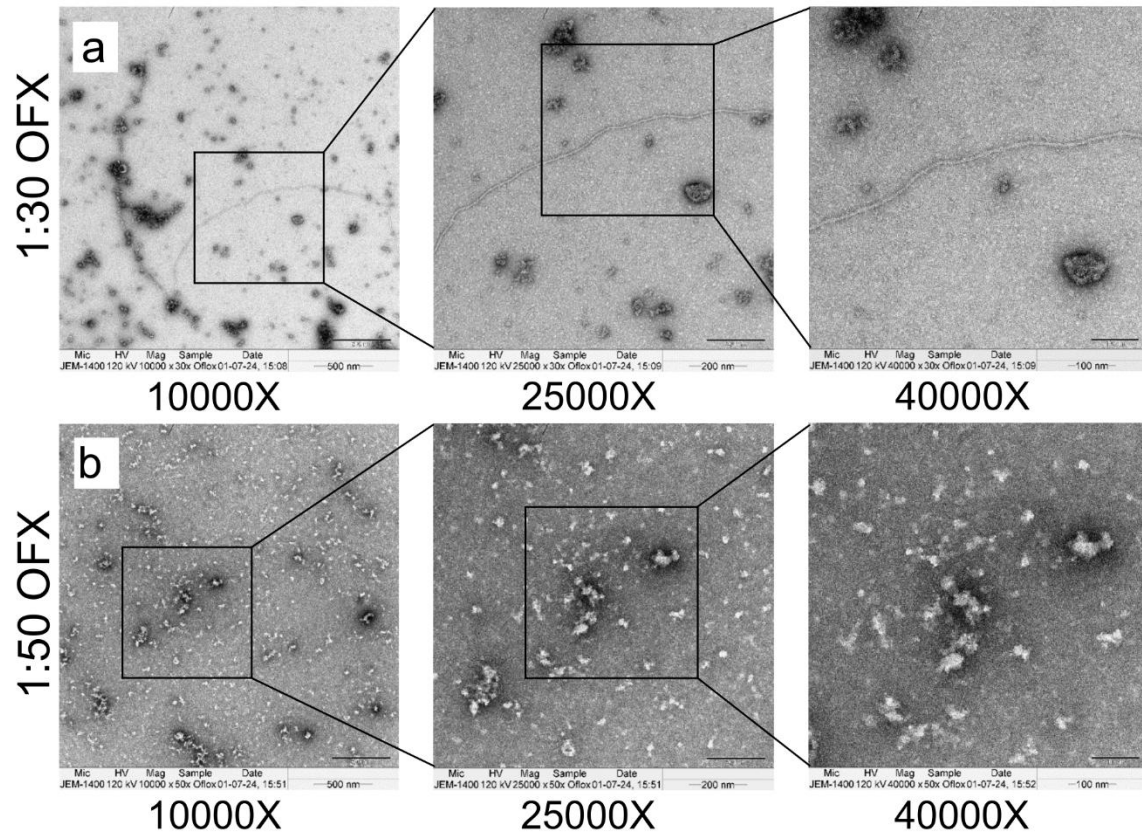

**Fig.S5.** OFX-induced morphological changes in F-actin visualized by TEM. (a) F-actin treated with OFX at a 1:30 molar ratio; (b) F-actin treated with OFX at a 1:50 molar ratio. Images were captured at 10,000 $\times$  (scale bar: 500 nm), 25,000 $\times$  (scale bar: 200 nm), and 40,000 $\times$  (scale bar: 100 nm).

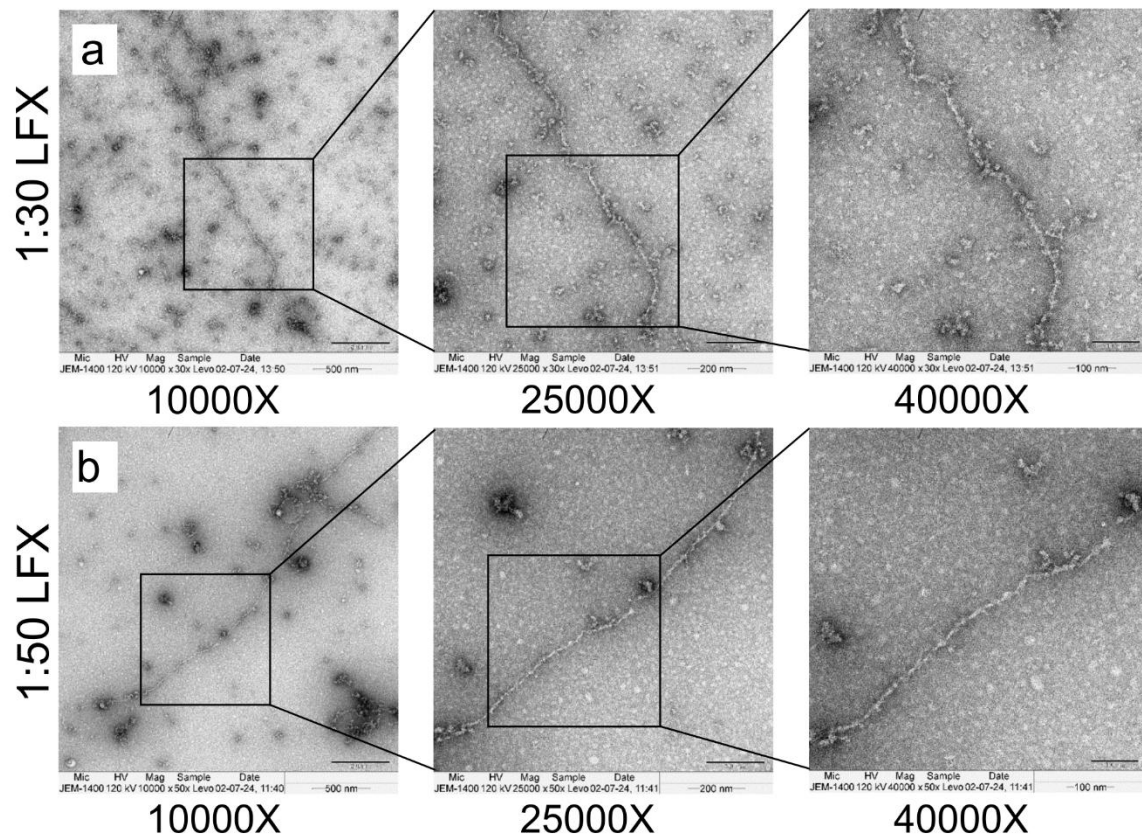

**Fig.S6.** LFX-induced morphological changes in F-actin visualized by TEM. (a) F-actin treated with LFX at a 1:30 molar ratio; (b) F-actin treated with LFX at a 1:50 molar ratio. Images were captured at 10,000 $\times$  (scale bar: 500 nm), 25,000 $\times$  (scale bar: 200 nm), and 40,000 $\times$  (scale bar: 100 nm).



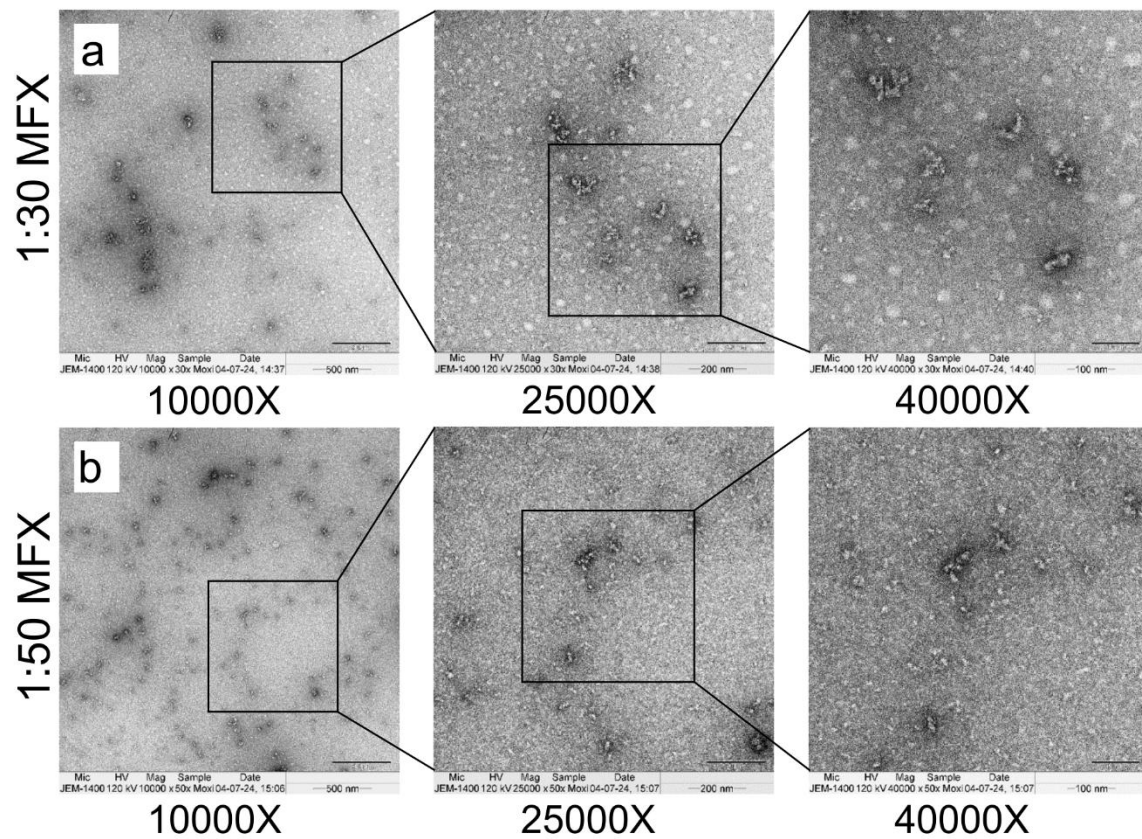

**Fig.S7.** MFX-induced morphological changes in F-actin visualized by TEM. (a) F-actin treated with MFX at a 1:30 molar ratio; (b) F-actin treated with MFX at a 1:50 molar ratio. Images were captured at 10,000 $\times$  (scale bar: 500 nm), 25,000 $\times$  (scale bar: 200 nm), and 40,000 $\times$  (scale bar: 100 nm).



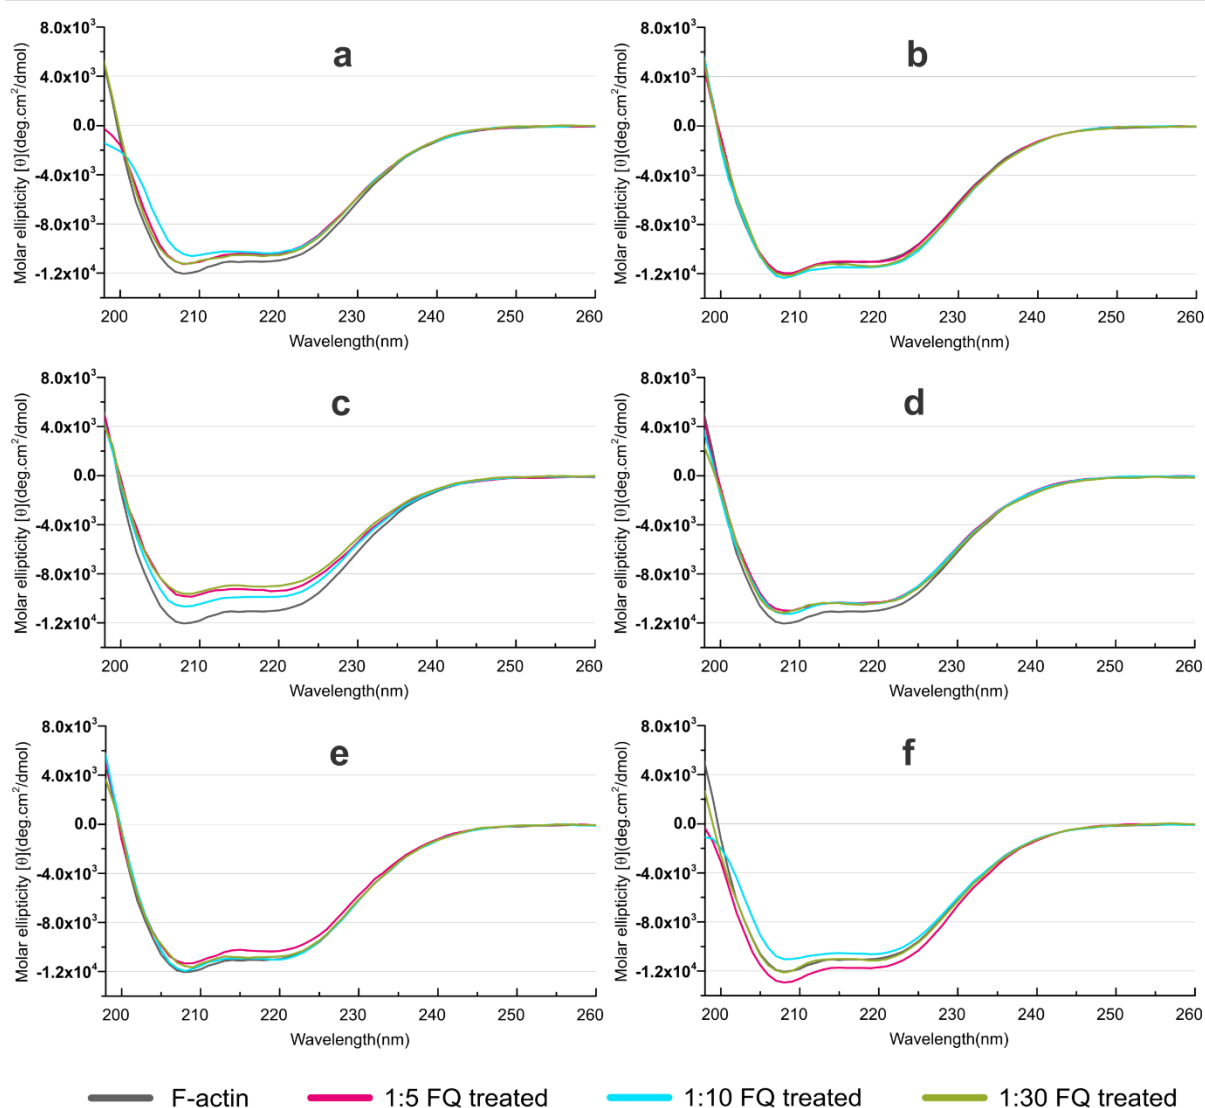

**Fig.S8.** CD spectra of F-actin treated with (a) CFX; (b) NFX; (c) OFX; (d) LFX; (e) NDA; (f) MFX titrated at 1:5 (red curve), 1:10 (cyan curve), and 1:30 (olive curve) molar ratios. Untreated F-actin is shown as grey curve.

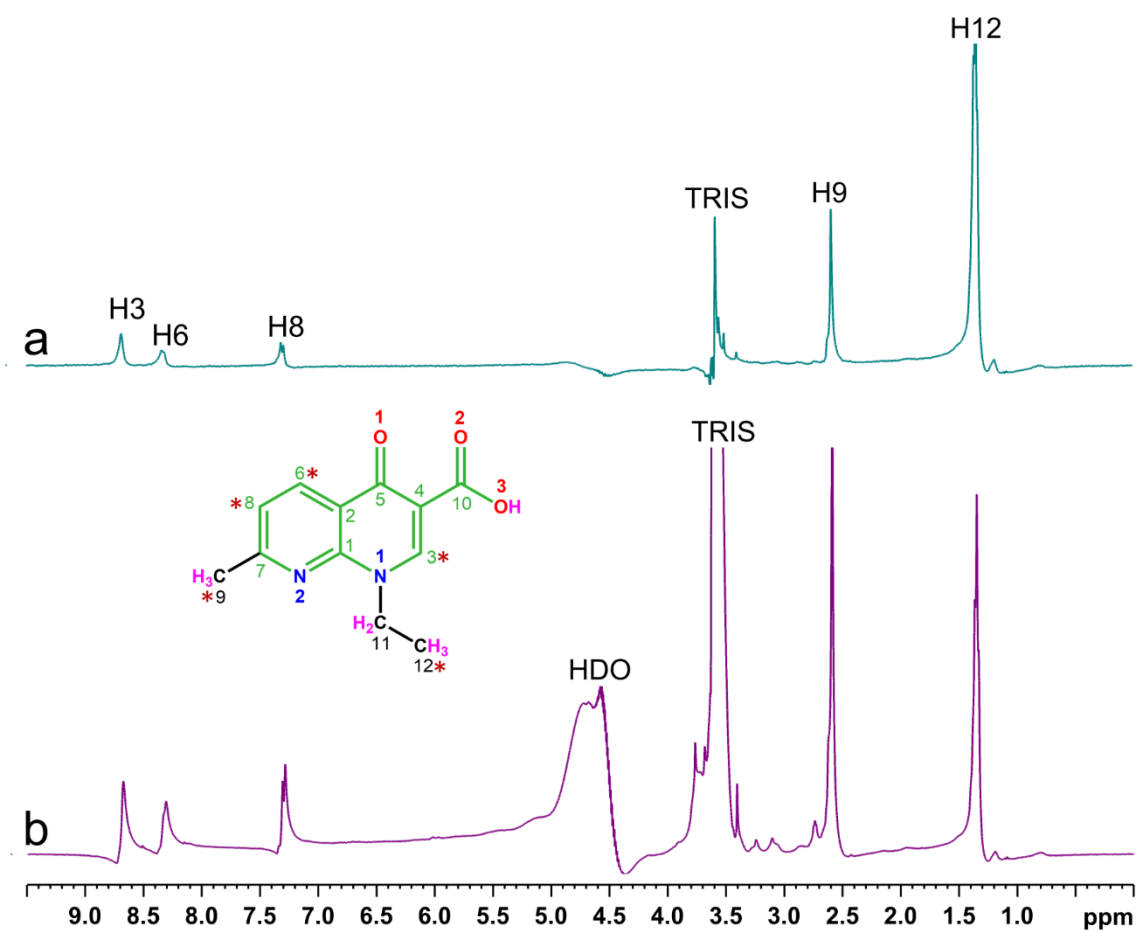

**Fig.S9.** (a) STD spectrum of NDA in presence of actin; (b) Reference spectrum (off resonance) of NDA in presence of actin. The compound was added to 2mM final concentration to result in a 50-fold excess of the ligand.

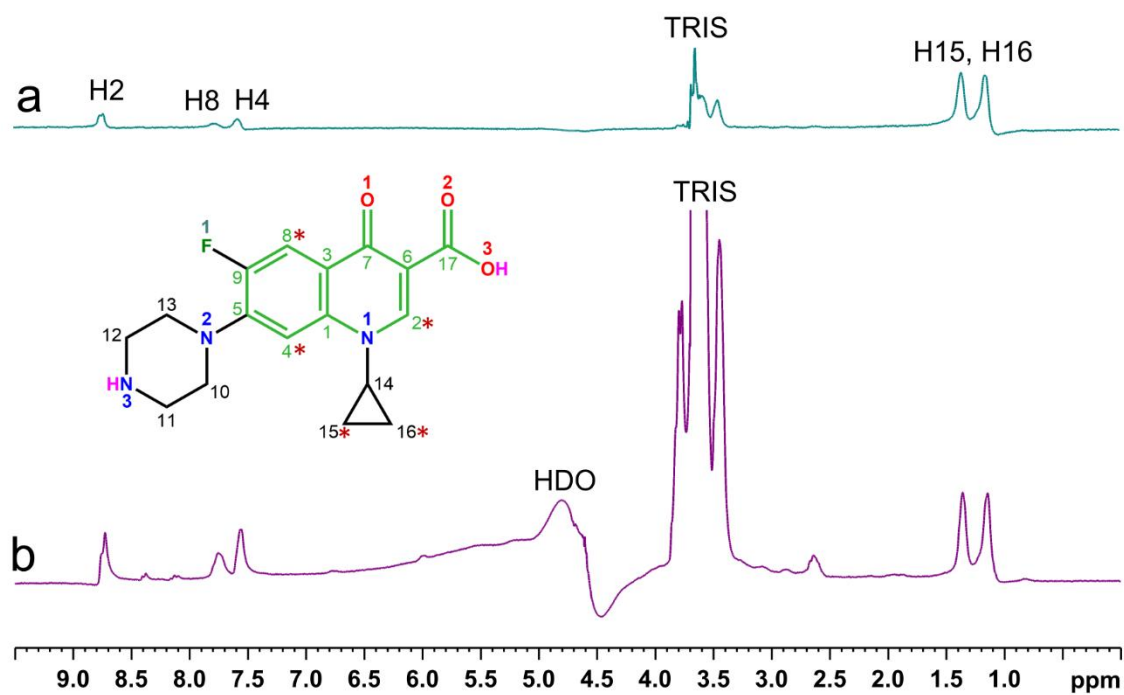

**Fig.S10.** (a) STD spectrum of CFX in presence of actin; (b) Reference spectrum (off resonance) of CFX in presence of actin. The compound was added to 2mM final concentration to result in a 50-fold excess of the ligand.

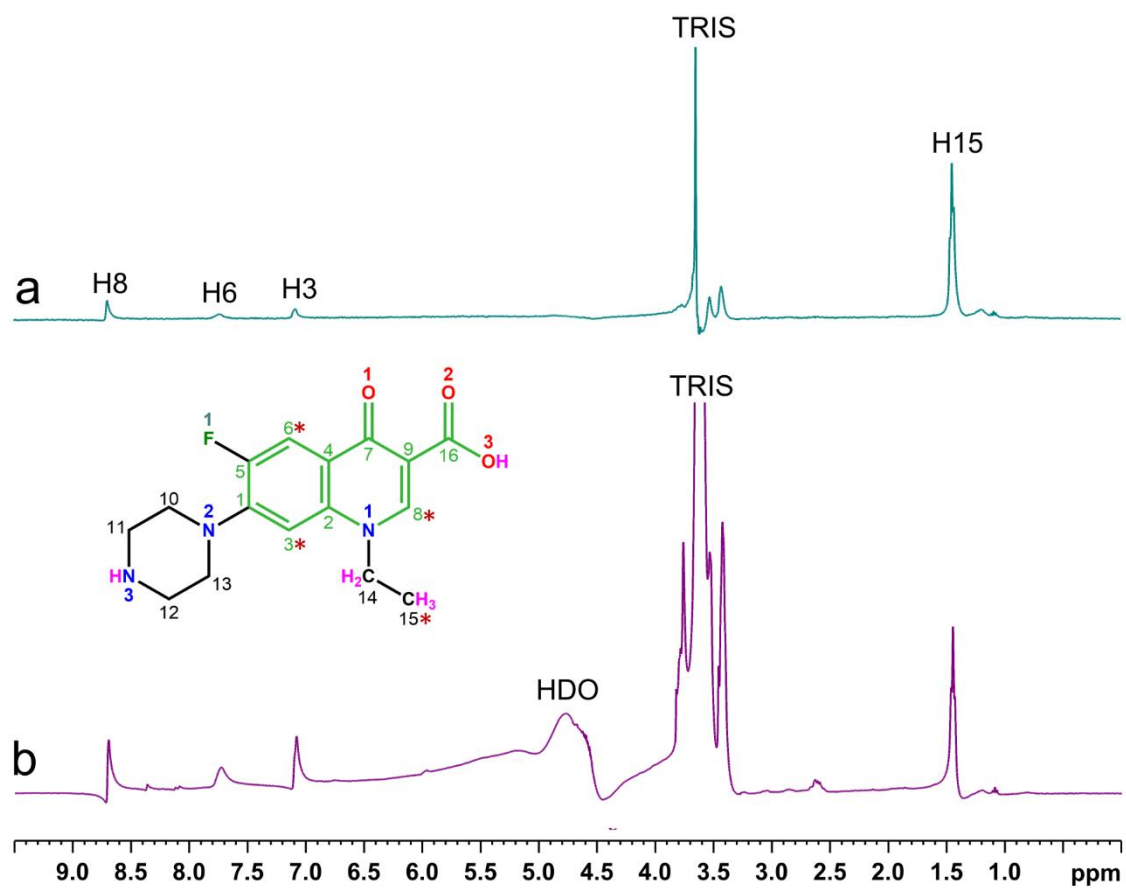

**Fig.S11.** (a) STD spectrum of NFX in presence of actin; (b) Reference spectrum (off resonance) of NFX in presence of actin. The compound was added to 2mM final concentration to result in a 50-fold excess of the ligand.

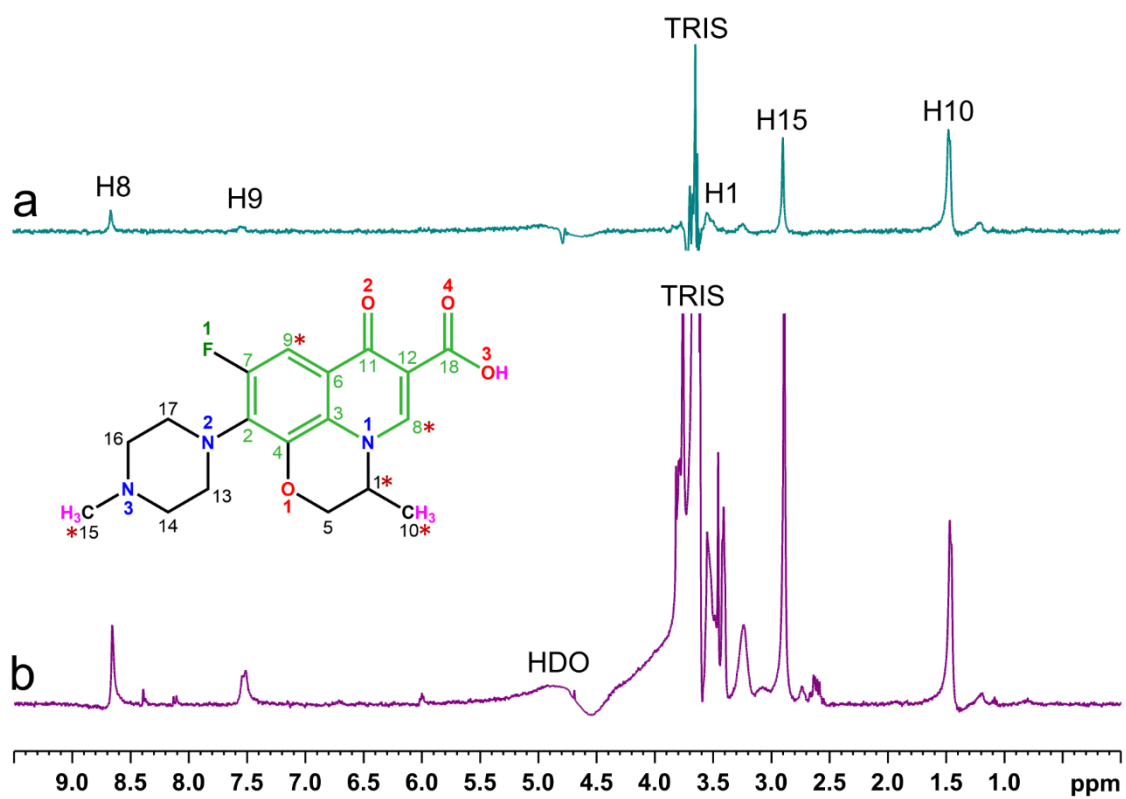

**Fig.S12.** (a) STD spectrum of OFX in presence of actin; (b) Reference spectrum (off resonance) of OFX in presence of actin. The compound was added to 2mM final concentration to result in a 50-fold excess of the ligand.

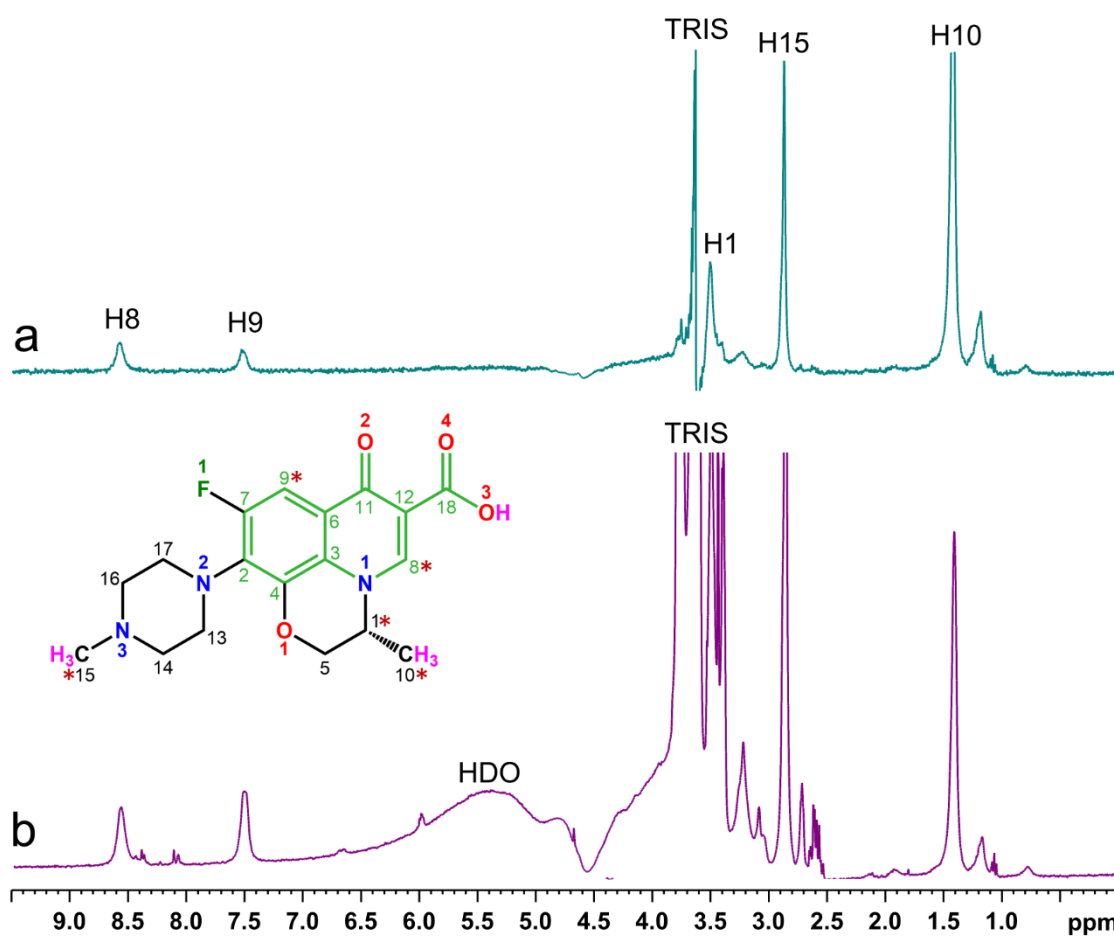

**Fig.S13.** (a) STD spectrum of LFX in presence of actin; (b) Reference spectrum (off resonance) of LFX in presence of actin. The compound was added to 2mM final concentration to result in a 50-fold excess of the ligand.

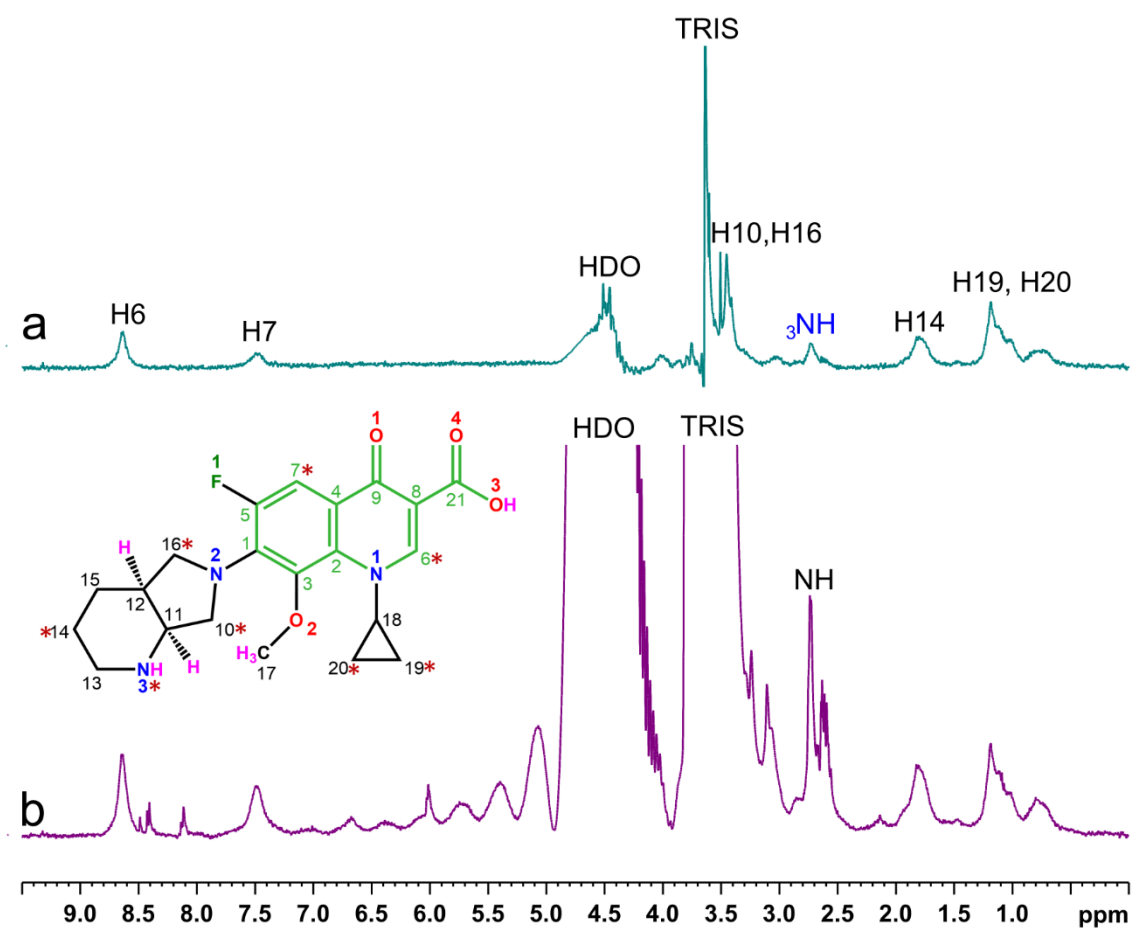

**Fig.S14.** (a) STD spectrum of MFX in presence of actin; (b) Reference spectrum (off resonance) of MFX in presence of actin. The compound was added to 2mM final concentration to result in a 50-fold excess of the ligand.



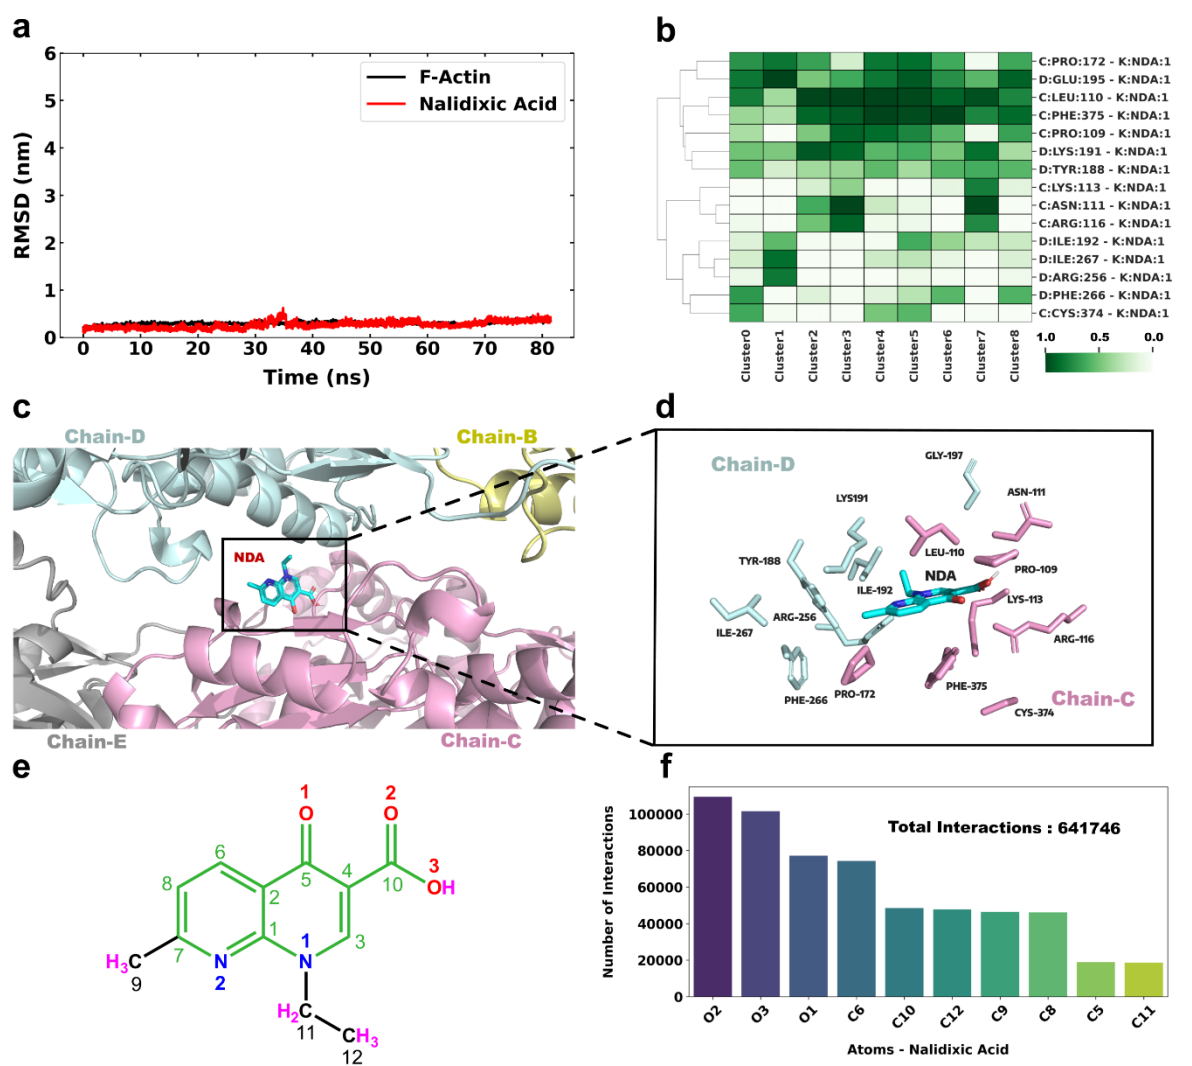

**Fig.S15.** Interaction dynamics of F-actin with NDA. (a) RMSD plot of the pentameric F-actin–NDA complex with F-actin in black and NDA in red; (b) Heatmap representation of frequently interacting amino acids across all the trajectories; (c) NDA, shown as sticks in cyan, bound at the interface of the pentameric F-actin represented as cartoon with Chain A (light blue), Chain B (yellow), and Chain C (pink); (d) Amino acid residues of F-actin (shown as sticks) interacting with NDA as seen in the heatmap; (e) 2D annotated structure of NDA; (f) Top 10 frequently interacting atoms of NDA (all trajectories) with F-actin.

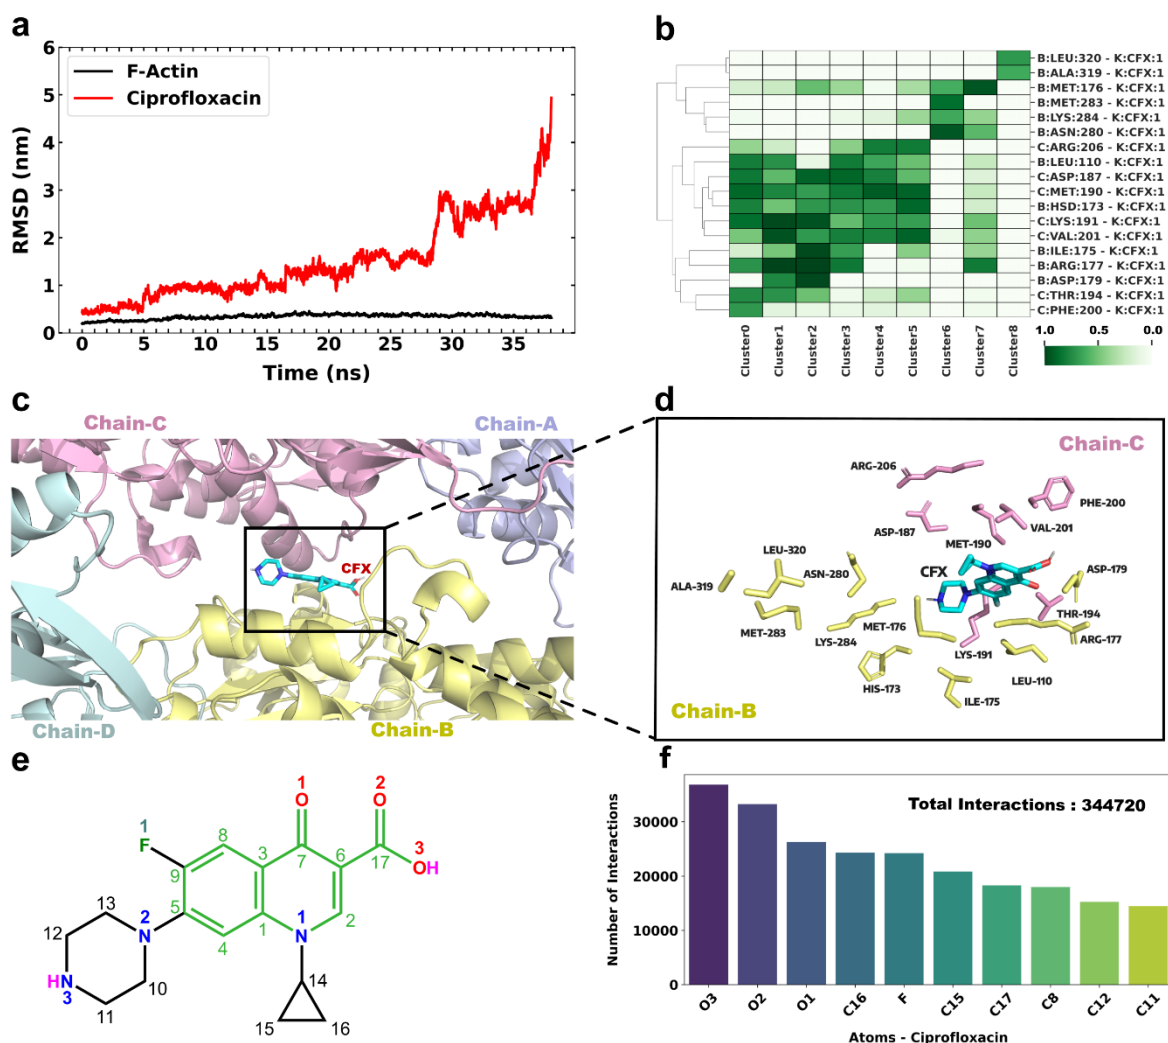

**Fig.S16.** Interaction dynamics of F-actin with CFX. (a) RMSD plot of the pentameric F-actin–CFX complex with F-actin in black and CFX in red; (b) Heatmap representation of frequently interacting amino acids across all the trajectories; (c) CFX, shown as sticks in cyan, bound at the interface of the pentameric F-actin represented as cartoon with Chain A (light blue), Chain B (yellow), and Chain C (pink); (d) Amino acid residues of F-actin (shown as sticks) interacting with CFX as seen in the heatmap; (e) 2D annotated structure of CFX; (f) Top 10 frequently interacting atoms of CFX (all trajectories) with F-actin.

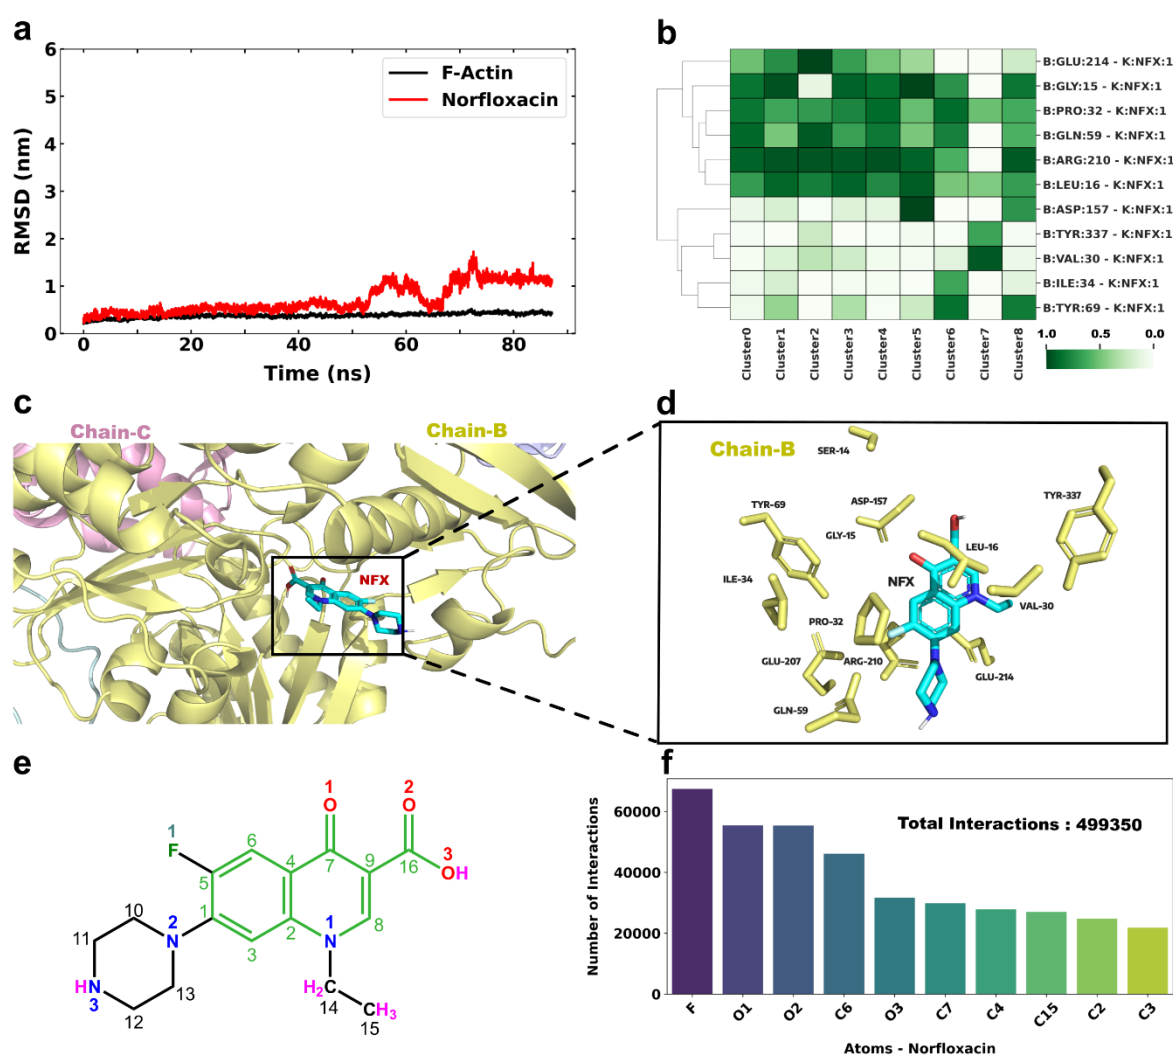

**Fig.S17.** Interaction dynamics of F-actin with NFX. (a) RMSD plot of the pentameric F-actin–NFX complex with F-actin in black and NFX in red; (b) Heatmap representation of frequently interacting amino acids across all the trajectories; (c) NFX, shown as sticks in cyan, bound at the interface of the pentameric F-actin represented as cartoon with Chain A (light blue), Chain B (yellow), and Chain C (pink); (d) Amino acid residues of F-actin (shown as sticks) interacting with NFX as seen in the heatmap; (e) 2D annotated structure of NFX; (f) Top 10 frequently interacting atoms of NFX (all trajectories) with F-actin.

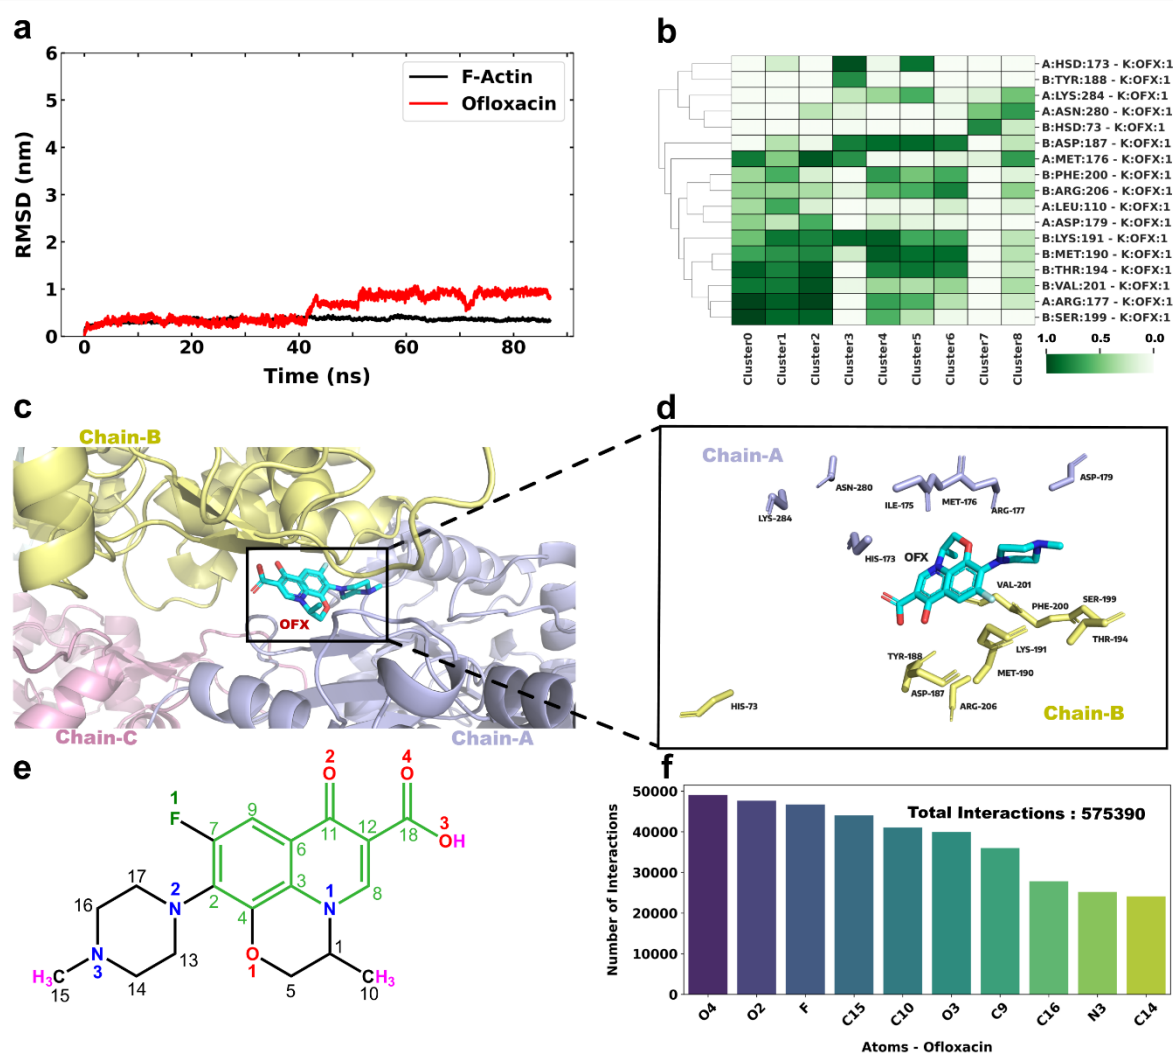

**Fig.S18.** Interaction dynamics of F-actin with OFX. (a) RMSD plot of the pentameric F-actin–OFX complex with F-actin in black and OFX in red; (b) Heatmap representation of frequently interacting amino acids across all the trajectories; (c) OFX, shown as sticks in cyan, bound at the interface of the pentameric F-actin represented as cartoon with Chain A (light blue), Chain B (yellow), and Chain C (pink); (d) Amino acid residues of F-actin (shown as sticks) interacting with OFX as seen in the heatmap; (e) 2D annotated structure of OFX; (f) Top 10 frequently interacting atoms of OFX (all trajectories) with F-actin.

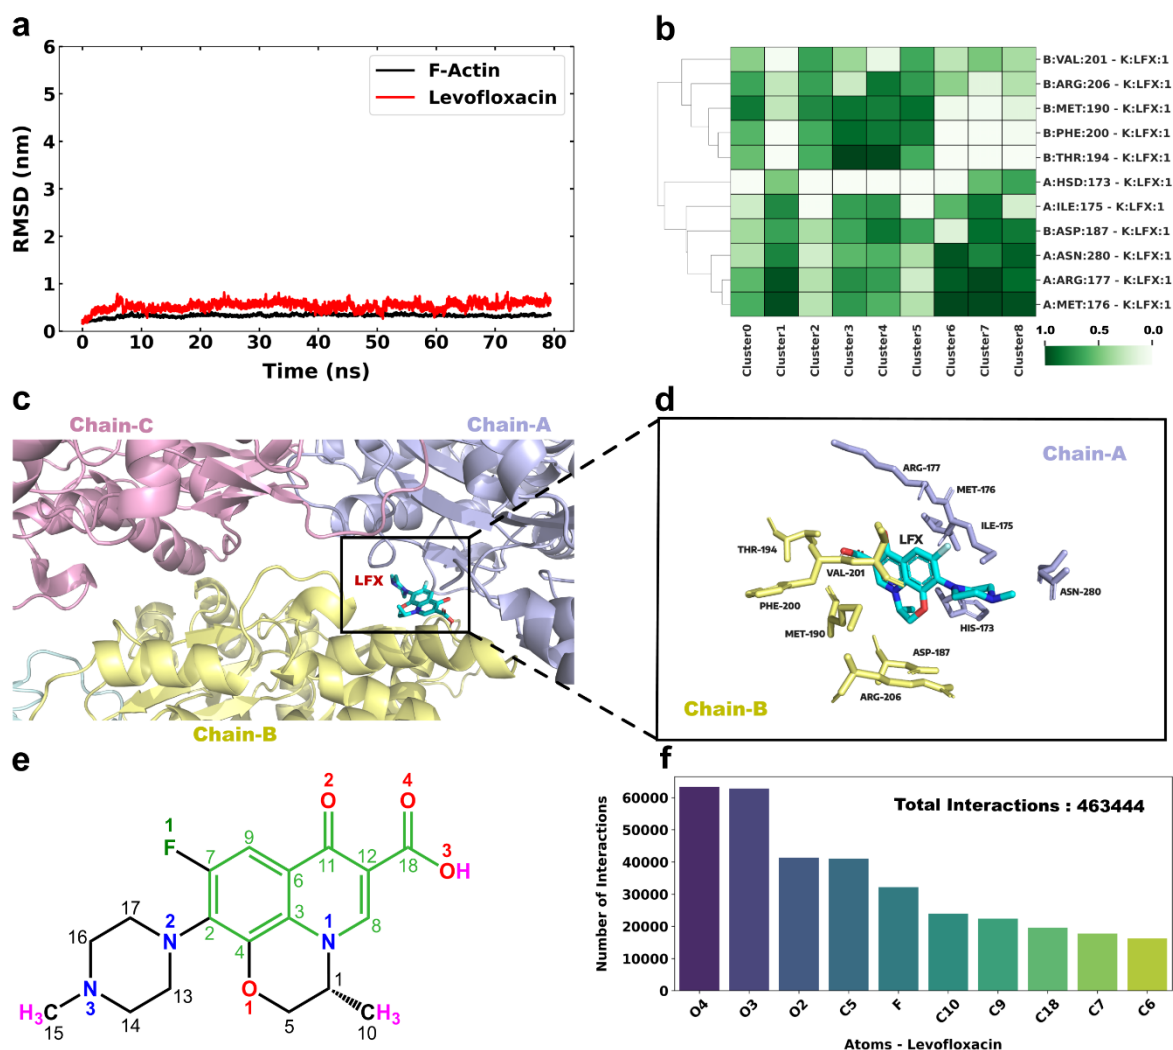

**Fig.S19.** Interaction dynamics of F-actin with LFX. (a) RMSD plot of the pentameric F-actin–LFX complex with F-actin in black and LFX in red; (b) Heatmap representation of frequently interacting amino acids across all the trajectories; (c) LFX, shown as sticks in cyan, bound at the interface of the pentameric F-actin represented as cartoon with Chain A (light blue), Chain B (yellow), and Chain C (pink); (d) Amino acid residues of F-actin (shown as sticks) interacting with LFX as seen in the heatmap; (e) 2D annotated structure of LFX; (f) Top 10 frequently interacting atoms of LFX (all trajectories) with F-actin.

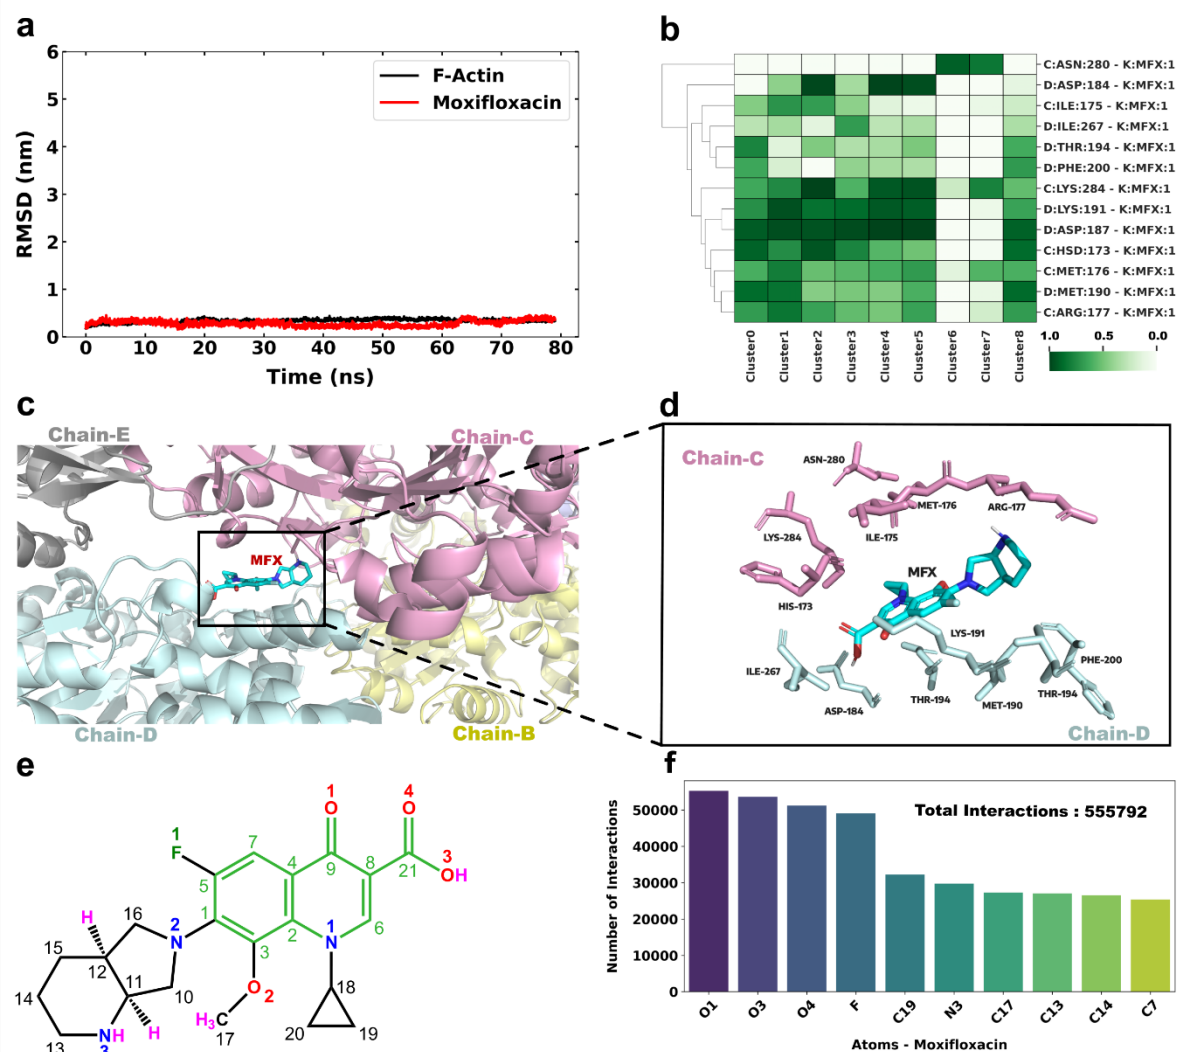

**Fig.S20.** Interaction dynamics of F-actin with MFX. (a) RMSD plot of the pentameric F-actin–MFX complex with F-actin in black and MFX in red; (b) Heatmap representation of frequently interacting amino acids across all the trajectories; (c) MFX, shown as sticks in cyan, bound at the interface of the pentameric F-actin represented as cartoon with Chain A (light blue), Chain B (yellow), and Chain C (pink); (d) Amino acid residues of F-actin (shown as sticks) interacting with MFX as seen in the heatmap; (e) 2D annotated structure of MFX; (f) Top 10 frequently interacting atoms of MFX (all trajectories) with F-actin.

## Supplementary Tables

**Table S1:** Secondary structure content of F-actin upon treatment with fluoroquinolones (FQs) at various molar ratios.

|                                              |             | Secondary structural content |           |           |            |
|----------------------------------------------|-------------|------------------------------|-----------|-----------|------------|
| Drugs                                        | Molar Ratio | Helix (%)                    | Sheet (%) | Turns (%) | Others (%) |
| <b>3 <math>\mu</math>M F-actin (control)</b> |             | 30.00                        | 23.50     | 12.20     | 34.30      |
| <b>NDA</b>                                   | 1:5         | 31.80                        | 20.90     | 12.60     | 34.70      |
|                                              | 1:10        | 32.30                        | 21.10     | 13.10     | 33.50      |
|                                              | 1:30        | 34.10                        | 21.10     | 12.10     | 32.40      |
| <b>CFX</b>                                   | 1:5         | 27.50                        | 23.20     | 13.20     | 36.10      |
|                                              | 1:10        | 31.00                        | 17.50     | 13.30     | 38.20      |
|                                              | 1:30        | 27.10                        | 27.00     | 12.40     | 33.50      |
| <b>NFX</b>                                   | 1:5         | 33.00                        | 21.30     | 12.60     | 33.10      |
|                                              | 1:10        | 31.20                        | 21.30     | 12.50     | 35.00      |
|                                              | 1:30        | 32.20                        | 19.30     | 13.50     | 35.00      |
| <b>OFX</b>                                   | 1:5         | 29.10                        | 22.80     | 13.00     | 35.10      |
|                                              | 1:10        | 26.70                        | 25.40     | 12.40     | 35.50      |
|                                              | 1:30        | 25.40                        | 26.50     | 12.40     | 35.70      |
| <b>LFX</b>                                   | 1:5         | 28.10                        | 24.70     | 12.50     | 34.70      |
|                                              | 1:10        | 34.00                        | 18.40     | 13.40     | 34.20      |
|                                              | 1:30        | 22.40                        | 28.30     | 12.80     | 36.50      |
| <b>SFX</b>                                   | 1:5         | 28.50                        | 19.50     | 13.90     | 38.10      |
|                                              | 1:10        | 29.20                        | 23.20     | 13.00     | 34.60      |
|                                              | 1:30        | 29.60                        | 22.20     | 12.90     | 35.30      |
| <b>MFX</b>                                   | 1:5         | 31.60                        | 20.20     | 12.50     | 35.70      |
|                                              | 1:10        | 28.80                        | 20.30     | 13.20     | 37.70      |
|                                              | 1:30        | 30.60                        | 19.60     | 13.80     | 36.00      |



**Table S2:** Molecular Docking analysis of FQs against F-actin

| Sr. No. | Compound Name | Binding Energy<br>(kcal.mol <sup>-1</sup> ) |
|---------|---------------|---------------------------------------------|
| 1       | NDA           | -6.5                                        |
| 2       | CFX           | -7.6                                        |
| 3       | NFX           | -7.6                                        |
| 4       | OFX           | -7.7                                        |
| 5       | LFX           | -7.4                                        |
| 6       | SFX           | -7.8                                        |
| 7       | MXF           | -7.7                                        |
